# Supplementary material for: Safety and Efficacy of Naldemedine for the Treatment of Opioid-Induced Constipation in Patients with Chronic Non-Cancer Pain Receiving Opioid Therapy: A Subgroup Analysis of Patients ≥ 65 Years of Age
Source: PubMed Central journal article supplement — Drugs Aging. 2020 Feb 21;37(4):271–9. doi: 10.1007/s40266-020-00753-2 (PMC7096364; doi:10.1007/s40266-020-00753-2), 2020-02-21
Supplement: 40266_2020_753_MOESM1_ESM.pdf [file 40266_2020_753_MOESM1_ESM.pdf]

## Online Resource 1

Safety and Efficacy of Naldemedine for the Treatment of Opioid-Induced Constipation in Patients With Chronic Non-Cancer Pain Receiving Opioid Therapy: A Subgroup Analysis of Patients  $\geq$  65 Years of Age

**Submitted to** *Drugs & Aging*

**Authors:** James Wild<sup>1</sup>; Lynn Webster<sup>2</sup>; Tadaaki Yamada<sup>3</sup>; Martin Hale<sup>4</sup>

**Affiliations:** <sup>1</sup>Upstate Clinical Research Associates, Williamsville, NY, USA;

<sup>2</sup>PRA Health Sciences, Salt Lake City, UT, USA; <sup>3</sup>Shionogi Inc., Florham Park, NJ, USA; <sup>4</sup>Gold Coast Research LLC, Plantation, FL, USA

Corresponding Author: James Wild, MD; E-mail: [jwild@roadrunner.com](mailto:jwild@roadrunner.com)

### COMPOSE-1,-2, and -3 Institutional Review Boards

| COMPOSE-1                                                                                                                                                      | COMPOSE-2                                                                                                                 | COMPOSE-3                                                                                                                                                                                                                    |
|----------------------------------------------------------------------------------------------------------------------------------------------------------------|---------------------------------------------------------------------------------------------------------------------------|------------------------------------------------------------------------------------------------------------------------------------------------------------------------------------------------------------------------------|
| <p>Ethikkommission der<br/>Medizinischen Universität<br/>Wien<br/>Borschkegasse 8b, E06<br/>Wien, Wien 1090<br/>Austria</p>                                    | <p>Ethikkommission der Stadt<br/>Wien<br/>Thomas-Klestil-Platz 8<br/>Vienna Vienna 1030<br/>Austria</p>                   | <p>Bellberry HREC<br/>129 Glen Osmond Road<br/>Eastwood, SA 5063<br/>Australia</p>                                                                                                                                           |
| <p>CEC/LEC: Etická komise<br/>pro<br/>multicentrická hodnocení<br/>Krajská<br/>nemocnice Liberec, a.s.<br/>Husova 10<br/>Liberec 460 63<br/>Czech Republic</p> | <p>CEC/LEC: Etická komise<br/>Krajská<br/>nemocnice Liberec, a.s.<br/>Husova 10<br/>Liberec 460 63<br/>Czech Republic</p> | <p>Hunter New England<br/>Research<br/>Ethics Committee<br/>Research Ethics and<br/>Governance<br/>Unit, District Headquarters<br/>Administration Building,<br/>Lookout<br/>Road<br/>New Lambton, NSW 2305<br/>Australia</p> |
| <p>Ethikkommission der<br/>Bayerischen<br/>Landesärztekammer<br/>Mühlbasurstr 16<br/>München, Bayern 81677<br/>Germany</p>                                     | <p>Ethikkommission der<br/>Landesärztekammer<br/>Im Semmicht 33<br/>Jena<br/>Thuringen 07751<br/>Germany</p>              | <p>Royal Adelaide Hospital<br/>Research<br/>Ethics Committee<br/>Royal Adelaide Hospital<br/>North Terrace<br/>Adelaide SA 5000</p>                                                                                          |

|                                                                                                                                                                      |                                                                                                                                         |                                                                                                                                                |
|----------------------------------------------------------------------------------------------------------------------------------------------------------------------|-----------------------------------------------------------------------------------------------------------------------------------------|------------------------------------------------------------------------------------------------------------------------------------------------|
|                                                                                                                                                                      |                                                                                                                                         | Australia                                                                                                                                      |
| Komisja Bioetyczna przy<br>Bydgoskiej Izbie<br>Lekarskiej<br>ul. Powstańców Warszawy<br>11 Bydgoszcz 85-681<br>Poland                                                | Komisja Bioetyczna przy<br>Beskidzkiej Izbie<br>Lekarskiej w<br>Bielsku-Bialej<br>ul. Krasinskiego 28<br>Bielsko-Biala 43-300<br>Poland | Commissie Medische<br>Ethiek van<br>Universitaire Ziekenhuizen<br>KULeuven – Campus<br>Gasthuisberg<br>Herestraat 49<br>Leuven 3000<br>Belgium |
| CEIC Hospital General<br>Universitario de Alicante<br>Centro de Diagnósticos<br>3a Planta (Edificio Gris)<br>C/ Pintor Baeza, 12<br>Alicante, Alicante 3010<br>Spain | CEIC Hospital Clinic de<br>Barcelona<br>c/ Villarroel. 170<br>Barcelona, Barcelona<br>08036<br>Spain                                    | Den Videnskabsetiske<br>Komite for<br>Region Syddanmark<br>Regionshuset<br>Damhaven 12<br>Vejle 7100<br>Denmark                                |
| NRES Committee East<br>Midlands<br>Nottingham 2<br>The Old Chapel<br>Royal Standard Place<br>Nottingham NG1 6FS<br>United Kingdom                                    | Schulman Associates<br>Institutional<br>Review Board<br>4445 Lake Forest Drive<br>Suite 300<br>Cincinnati, OH 45242<br>United States    | Tallinn Medical Research<br>Ethics<br>Committee<br>Hiiu str. 42<br>Tallinn<br>Harjumaa 11619<br>Estonia                                        |
| Reading Health System<br>Institutional Review Board                                                                                                                  |                                                                                                                                         | CPP TOURS – Region<br>Centre –                                                                                                                 |

|                                                                                                                                                   |  |                                                                                                                                                               |
|---------------------------------------------------------------------------------------------------------------------------------------------------|--|---------------------------------------------------------------------------------------------------------------------------------------------------------------|
| <p>Sixth Avenue and Spruce Street<br/>N-Building, Ground Floor<br/>West Reading, PA 19611<br/>United States</p>                                   |  | <p>Ouest 1<br/>Hopital Bretonneau –<br/>CHRU<br/>TOURS – Batiment B1A<br/>2, Boulevard Tonnelles<br/>TOURS Cedex 9 37044<br/>France</p>                       |
| <p>Schulman Associates<br/>Institutional<br/>Review Board<br/>4445 Lake Forest Drive<br/>Suite 300<br/>Cincinnati, OH 45242<br/>United States</p> |  | <p>Ethikkommission der<br/>Landesärztekammer<br/>Thüringen<br/>Im Semmicht 33<br/>Jena<br/>Thüringen 07751<br/>Germany</p>                                    |
|                                                                                                                                                   |  | <p>Egeszsegügyi<br/>Tudományos<br/>Tanács Klinikai<br/>Farmakológiai<br/>Etkai Bizottsága<br/>Arany János u. 6-8<br/>Budapest H-1051<br/>Nagy<br/>Hungary</p> |
|                                                                                                                                                   |  | <p>Komisja Bioetyczna przy<br/>Slaskiej</p>                                                                                                                   |

|  |  |                                                                                                                                                                  |
|--|--|------------------------------------------------------------------------------------------------------------------------------------------------------------------|
|  |  | Izbie Lekarskiej w<br>Katowicach<br>ul. Grazynskiego 49a<br>Katowice 40-126<br>Poland                                                                            |
|  |  | University of the<br>Witwatersrand,<br>Human Research Ethics<br>Committee<br>8 Blackwood Avenue<br>Parktown<br>Johannesburg<br>Gauteng 2193<br>South Africa      |
|  |  | CEIC – Consorci Sanitari<br>Integral<br>Hospital General De I-<br>Hospitalet<br>AV Joseph Molins, 29-41<br>L'Hospitalet de Llobregat<br>Barcelona 08906<br>Spain |
|  |  | CEIC Hospital Universitari<br>de<br>Girona Doctor Josep                                                                                                          |

|  |  |                                                                                                                                                                                                                                              |
|--|--|----------------------------------------------------------------------------------------------------------------------------------------------------------------------------------------------------------------------------------------------|
|  |  | <p>Trueta</p> <p>Avinguda de Franca s/n</p> <p>Girona 17007</p> <p>Spain</p>                                                                                                                                                                 |
|  |  | <p>Regionala</p> <p>Etikprovningarnamnden</p> <p>i Stockholm</p> <p>Karolinska Institutet/Solna</p> <p>Nobels vag 9, plan D3</p> <p>Stockholm 171</p> <p>Sweden</p>                                                                          |
|  |  | <p>NRES Committee North</p> <p>West –</p> <p>Liverpool East</p> <p>North West Centre of</p> <p>Research</p> <p>Ethics Committees</p> <p>3rd Floor, Barlow House, 4</p> <p>Minshull Street</p> <p>Manchester M1-3DZ</p> <p>United Kingdom</p> |
|  |  | <p>Schulman Associates</p> <p>Institutional</p> <p>Review Board</p> <p>4445 Lake Forest Drive</p>                                                                                                                                            |

|  |  |                                                    |
|--|--|----------------------------------------------------|
|  |  | Suite 300<br>Cincinnati, OH 45242<br>United States |
|--|--|----------------------------------------------------|
